# Supplementary material
Source: PubMed Central journal article supplement (PMC3878700)
Supplement: CJN.04570413_CJN04570413SupplementaryData.pdf [file CJN.04570413_CJN04570413SupplementaryData.pdf]

## Supplementary Material

**Table A. Linear and Logistic Regression Analysis of Albumin-to-Creatinine Ratio Outcomes Against Quartiled and Log-Transformed Urinary Phthalates (Reprised Without Sample Weights).**

|                      | Increment in Albumin-to-Creatinine Ratio | Odds of Micro/macroalbuminuria | Odds of Higher Albumin-to-Creatinine Quartile |
|----------------------|------------------------------------------|--------------------------------|-----------------------------------------------|
| First Quartile DEHP  | Reference                                | Reference                      | Reference                                     |
| Second Quartile DEHP | +0.19 (-0.45 to +0.92)                   | 1.75 (0.59, 5.21)              | 1.32 (0.86, 2.02)                             |
| Third Quartile DEHP  | +0.24 (-0.44 to +1.03)                   | 2.98 (0.93, 8.42)              | 1.26 (0.79, 2.00)                             |
| Fourth Quartile DEHP | +0.92 (+0.15 to +1.80)*                  | 1.97 (0.61, 6.40)              | 1.81 (1.14, 2.87)*                            |

| Increment per Log Unit | Albumin-to-Creatinine Ratio | Odds of Micro/macroalbuminuria | Odds of Higher Albumin-to-Creatinine Quartile |
|------------------------|-----------------------------|--------------------------------|-----------------------------------------------|
| DEHP                   | +0.38 (+0.08 to +0.67)*     | 1.22 (0.86, 1.71)              | 1.20 (1.02, 1.40)*                            |

Abbreviations: Di-2-ethylhexylphthalate (DEHP).

All models control for gender, poverty-income ratio, caregiver education, serum cotinine, urinary creatinine, age, prehypertension, insulin resistance, Body Mass Index, hypercholesterolemia and race/ethnicity categories.

\* p < 0.05, \*\* p < 0.01

**Table B. Linear and Logistic Regression Analysis of Albumin-to-Creatinine Ratio Outcomes Against Quartiled and Log-Transformed Urinary Phthalates (Reprised With Multiple Imputation).**

|                      | Increment in Albumin-to-Creatinine Ratio | Odds of Micro/macroalbuminuria | Odds of Higher Albumin-to-Creatinine Quartile |
|----------------------|------------------------------------------|--------------------------------|-----------------------------------------------|
| First Quartile DEHP  | Reference                                | Reference                      | Reference                                     |
| Second Quartile DEHP | +0.34 (-0.42 to +1.21)                   | 1.71 (0.33, 9.00)              | 1.28 (0.80, 2.04)                             |
| Third Quartile DEHP  | +0.41 (-0.70 to +1.76)                   | 2.09 (0.36, 11.82)             | 1.20 (0.56, 2.54)                             |
| Fourth Quartile DEHP | +0.92 (+0.28 to +2.72)*                  | 1.92 (0.54, 6.82)              | 2.08 (1.15, 3.77)*                            |

| Increment per Log Unit | Albumin-to-Creatinine Ratio | Odds of Micro/macroalbuminuria | Odds of Higher Albumin-to-Creatinine Quartile |
|------------------------|-----------------------------|--------------------------------|-----------------------------------------------|
| DEHP                   | +0.56 (+0.08 to +1.06)*     | 1.16 (0.81, 1.65)              | 1.29 (1.03, 1.61)*                            |

Abbreviations: Di-2-ethylhexylphthalate (DEHP).

All models control for gender, poverty-income ratio, caregiver education, serum cotinine, urinary creatinine, age, prehypertension, insulin resistance, Body Mass Index, hypercholesterolemia and race/ethnicity categories.

\* p < 0.05, \*\* p < 0.01
